# Supplementary material for: Association between the Inflammatory Potential of the Diet and Biological Aging: A Cross-Sectional Analysis of 4510 Adults from the Moli-Sani Study Cohort
Source: MDPI journal article supplement (doi:10.3390/nu15061503), 2023-03-21
Supplement: s1 [file s1]

**Table S1.** Components, descriptions, and weights of the components of the dietary (DIS) inflammation score in the Moli-sani study.

| Components                                 | Description                                                                                                                                                                          | Weights |
|--------------------------------------------|--------------------------------------------------------------------------------------------------------------------------------------------------------------------------------------|---------|
| <i>DIS components<sup>1</sup></i>          |                                                                                                                                                                                      |         |
| Leafy greens and cruciferous vegetables    | Lettuce, broccoli, Brussels sprouts, cauliflower, turnip green, cabbage, kale, and spinach                                                                                           | -0.14   |
| Tomatoes                                   | Tomatoes, and tomato sauce                                                                                                                                                           | -0.78   |
| Other vegetables                           | Peppers, onions, artichokes, celery, mushrooms, eggplant, and beets                                                                                                                  | -0.16   |
| Apples and berries                         | Apple, pear, strawberries, and cherry                                                                                                                                                | -0.65   |
| Deep yellow or orange vegetables and fruit | Peach, cooked and raw carrots, squash, and figs                                                                                                                                      | -0.57   |
| Other fruits and real fruit juices         | Bananas, kiwi, oranges, grapefruits, mandarins, grapefruit, plums, melon, kaki, fruit juices, and orange juices                                                                      | -0.16   |
| Legumes                                    | Beans, lentils, and chickpeas                                                                                                                                                        | -0.04   |
| Fish                                       | Shellfish, shrimps and crustaceans, dried fish (i.e., salted codfish), canned fish and other fish not included in the previous categories (i.e., salmon, swordfish, anchovies, etc.) | -0.08   |
| Poultry                                    | Chicken or turkey with and without skin                                                                                                                                              | -0.45   |
| Red and organ meats                        | Hamburger, beef, pork, mutton, lamb, and offal                                                                                                                                       | 0.02    |
| Processed meats                            | Canned meat, and processed meat                                                                                                                                                      | 0.68    |
| High-fat dairy                             | Whole and semi-skimmed milk, whole milk, fruit yogurt, ice cream and hard cheese.                                                                                                    | -0.14   |
| Low-fat dairy                              | Low-fat cheese, ricotta cheese, and low-fat yogurt.                                                                                                                                  | -0.12   |
| Added sugars                               | Chocolate, candies, dried fruits, jams, canned fruits, dry cakes, sweetened carbonated beverages, and non-carbonated fruit drinks                                                    | 0.56    |
| Coffee and tea                             | Coffee (decaffeinated and caffeinated), and tea                                                                                                                                      | -0.25   |
| Refined grains and starchy vegetables      | Breakfast cereals, bread, rice, pasta, potatoes, and home-baked or ready-made cake                                                                                                   | 0.72    |
| Nuts                                       | Walnuts, hazelnuts, almonds, and peanuts                                                                                                                                             | -0.44   |
| Fats                                       | Butter, gravy, margarine, and mayonnaise or other creamy dressing                                                                                                                    | 0.31    |
| Supplement score <sup>2</sup>              | Ranked score of supplements: vitamins A, B, C, D, multivitamins, B-complex vitamins and iron                                                                                         | -0.80   |

<sup>1</sup>Dietary components were standardized by sex, to a mean of zero and SD of 1.

<sup>2</sup>All individual supplements were dummy variables, coded as “1” for consumption category and “0” for no-consumption for anti-inflammatory supplements (vitamins A, B, C, D, multivitamins, B-complex vitamins) and “0” or “-1” for pro-inflammatory supplements (iron).

<sup>3</sup>All lifestyle components were dummy variables, coded as 1 for the non-referent category and 0 for the referent category.

**Table S2.** Sensitivity analysis for biological aging ( $\Delta$ Age)<sup>1</sup> excluding comorbidities according to E-DII and DIS<sup>2</sup>, in the Moli-sani sub-cohort.

|                                 | Biological aging ( $\Delta$ Age) <sup>3</sup> |                   |                   |
|---------------------------------|-----------------------------------------------|-------------------|-------------------|
|                                 | n                                             | E-DII             | DIS <sup>5</sup>  |
| All the population <sup>4</sup> | 4,510                                         | 0.22 (0.05, 0.38) | 0.27 (0.10, 0.44) |
| <i>Exclusions</i>               |                                               |                   |                   |
| CVD                             | 4,262                                         | 0.29 (0.12, 0.47) | 0.29 (0.13, 0.46) |
| Cancer                          | 4,366                                         | 0.29 (0.12, 0.47) | 0.26 (0.09, 0.43) |
| Diabetes                        | 4,289                                         | 0.27 (0.10, 0.45) | 0.26 (0.09, 0.43) |
| Hypertension                    | 3,175                                         | 0.34 (0.15, 0.54) | 0.29 (0.10, 0.48) |
| Hypercholesterolemia            | 4,154                                         | 0.32 (0.14, 0.50) | 0.31 (0.14, 0.48) |

<sup>1</sup>beta-coefficients (95% CI) derived from multivariable linear models.

<sup>2</sup>Energy-adjusted Dietary Inflammatory Index = E-DII; Dietary Inflammation Score = DIS; Higher E-DII or DIS indicate more proinflammatory diet.

<sup>3</sup> $\Delta$ Age > 0 suggests accelerated biological aging of an organism compared to its chronological age, while  $\Delta$ Age < 0 indicates decelerated biological aging

<sup>4</sup>Adjusted for age (continuous), sex, education (lower secondary, upper secondary, post-secondary), smoking (non-smoker, smoker, former), BMI, urban, housing (rent, one- or >1 dwelling ownership), leisure-time physical activity (METs h/d), CVD, cancer, diabetes, hypertension, hyperlipidemia, hormonal therapy and menopausal status.

<sup>5</sup>Models for DIS were additionally adjusted by total energy.

**Table S3.** Sensitivity analysis for biological aging ( $\Delta$ Age)<sup>1</sup> for different cut-off point of age according to E-DII and DIS<sup>2</sup>, in the Moli-sani sub-cohort.

|                      |             | Biological aging ( $\Delta$ Age) <sup>3</sup> |                               |                    |                                   |
|----------------------|-------------|-----------------------------------------------|-------------------------------|--------------------|-----------------------------------|
|                      |             | E-DII <sup>4</sup>                            | DIS <sup>4,5</sup>            |                    |                                   |
|                      | n (%)       | $\beta$ (95%CI)                               | P-value<br>for<br>interaction | $\beta$ (95%CI)    | P-value<br>for<br>interact<br>ion |
| <b>Age groups, y</b> |             |                                               |                               |                    |                                   |
| <65                  | 3466 (76.8) | 0.24 (0.06, 0.42)                             | 0.0057                        | 0.63 (0.41, 0.84)  | 0.078                             |
| ≥65                  | 1044 (23.2) | 0.11 (-0.28, 0.51)                            |                               | 0.22 (-0.22, 0.66) |                                   |
| <b>Age groups, y</b> |             |                                               |                               |                    |                                   |
| <70                  | 3900 (86.5) | 0.22 (0.04, 0.39)                             | 0.013                         | 0.62 (0.40, 0.83)  | 0.40                              |
| ≥70                  | 610 (13.5)  | 0.02 (-0.48, 0.53)                            |                               | 0.42 (-0.16, 1.01) |                                   |

<sup>1</sup> $\beta$ -coefficients (95% CI) derived from multivariable linear models.

<sup>2</sup>Energy-adjusted Dietary Inflammatory Index = E-DII; Dietary Inflammation Score = DIS; Higher E-DII or DIS indicate more proinflammatory diet.

<sup>3</sup> $\Delta$ Age > 0 suggests accelerated biological aging of an organism compared to its chronological age, while  $\Delta$ Age < 0 indicates decelerated biological aging.

<sup>4</sup>Adjusted for age, sex, education (lower secondary, upper secondary, post-secondary), smoking (non-smoker, smoker, former), BMI, urban, housing (rent, one- or >1 dwelling ownership), leisure-time physical activity (METs h/d), CVD, cancer, diabetes, hypertension, hyperlipidemia, hormonal therapy and menopausal status, when not stratified for.

<sup>5</sup>Models for DIS were additionally adjusted by total energy.
